# Supplementary material for: Differential Diagnosis Generators: an Evaluation of Currently Available Computer Programs
Source: Springer Nature journal article supplement (doi:10.1007/s11606-011-1804-8), 2011-07-25
Supplement: MOESM3 [file 11606_2011_1804_MOESM3_ESM.docx]

Appendix 3. Excluded Programs.

|  | Intended for patients | Focus on one disease/  medical specialty | No ability to enter/  choose at least two symptoms/ characteristics | No ranking of diagnoses or indication of critical diagnoses | No ability to compare diagnoses | No diagnosis list or static list |
| --- | --- | --- | --- | --- | --- | --- |
| Doctor’s Lounge Differential Diagnosis |  |  | x | x | x | x |
| FirstConsult |  |  | x |  |  |  |
| Diagnosaurus 2 |  |  | x | x | x | x |
| Mobile DDX |  |  | x | x | x |  |
| Web MD Symptom Checker | x |  |  | x | x |  |
| eMedicine |  |  |  | x | x | x |
| Dynamed |  |  | x | x | x |  |
| UpToDate |  |  |  | x | x | x |
| Gideon (Infectious diseases) |  | x |  |  |  |  |
| Visual Diagnosis (Disorders with visible symptoms) |  | x |  |  |  |  |
| IDDX (Infectious diseases) |  | x |  |  |  |  |
| Oral Radiographic Differential Diagnosis |  | x |  |  |  |  |
| Brain Expert |  | x |  |  |  |  |
| Bone Expert |  | x |  |  |  |  |
| Dermatology Differential Diagnosis |  | x |  |  |  |  |
| Aphasia DX |  | x |  |  |  |  |
| VisualDX |  | x |  |  |  |  |
| DCSA: Diagnosis of Congenital Syndromes and Anomalies |  | x |  |  |  |  |
| SimulConsult (Pediatric Neurology) |  | x |  |  |  |  |
